# Supplementary material
Source: PubMed Central journal article supplement (PMC4917679)

Title: T cell receptor signaling pathway  
 Organism: Homo sapiens  
 Data Source: <http://www.genome.jp/kegg-bin/sl>

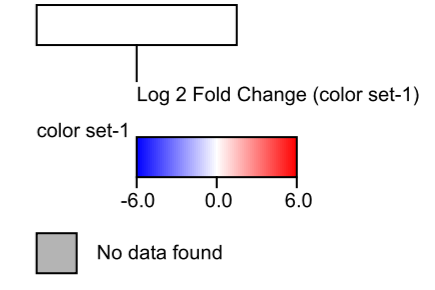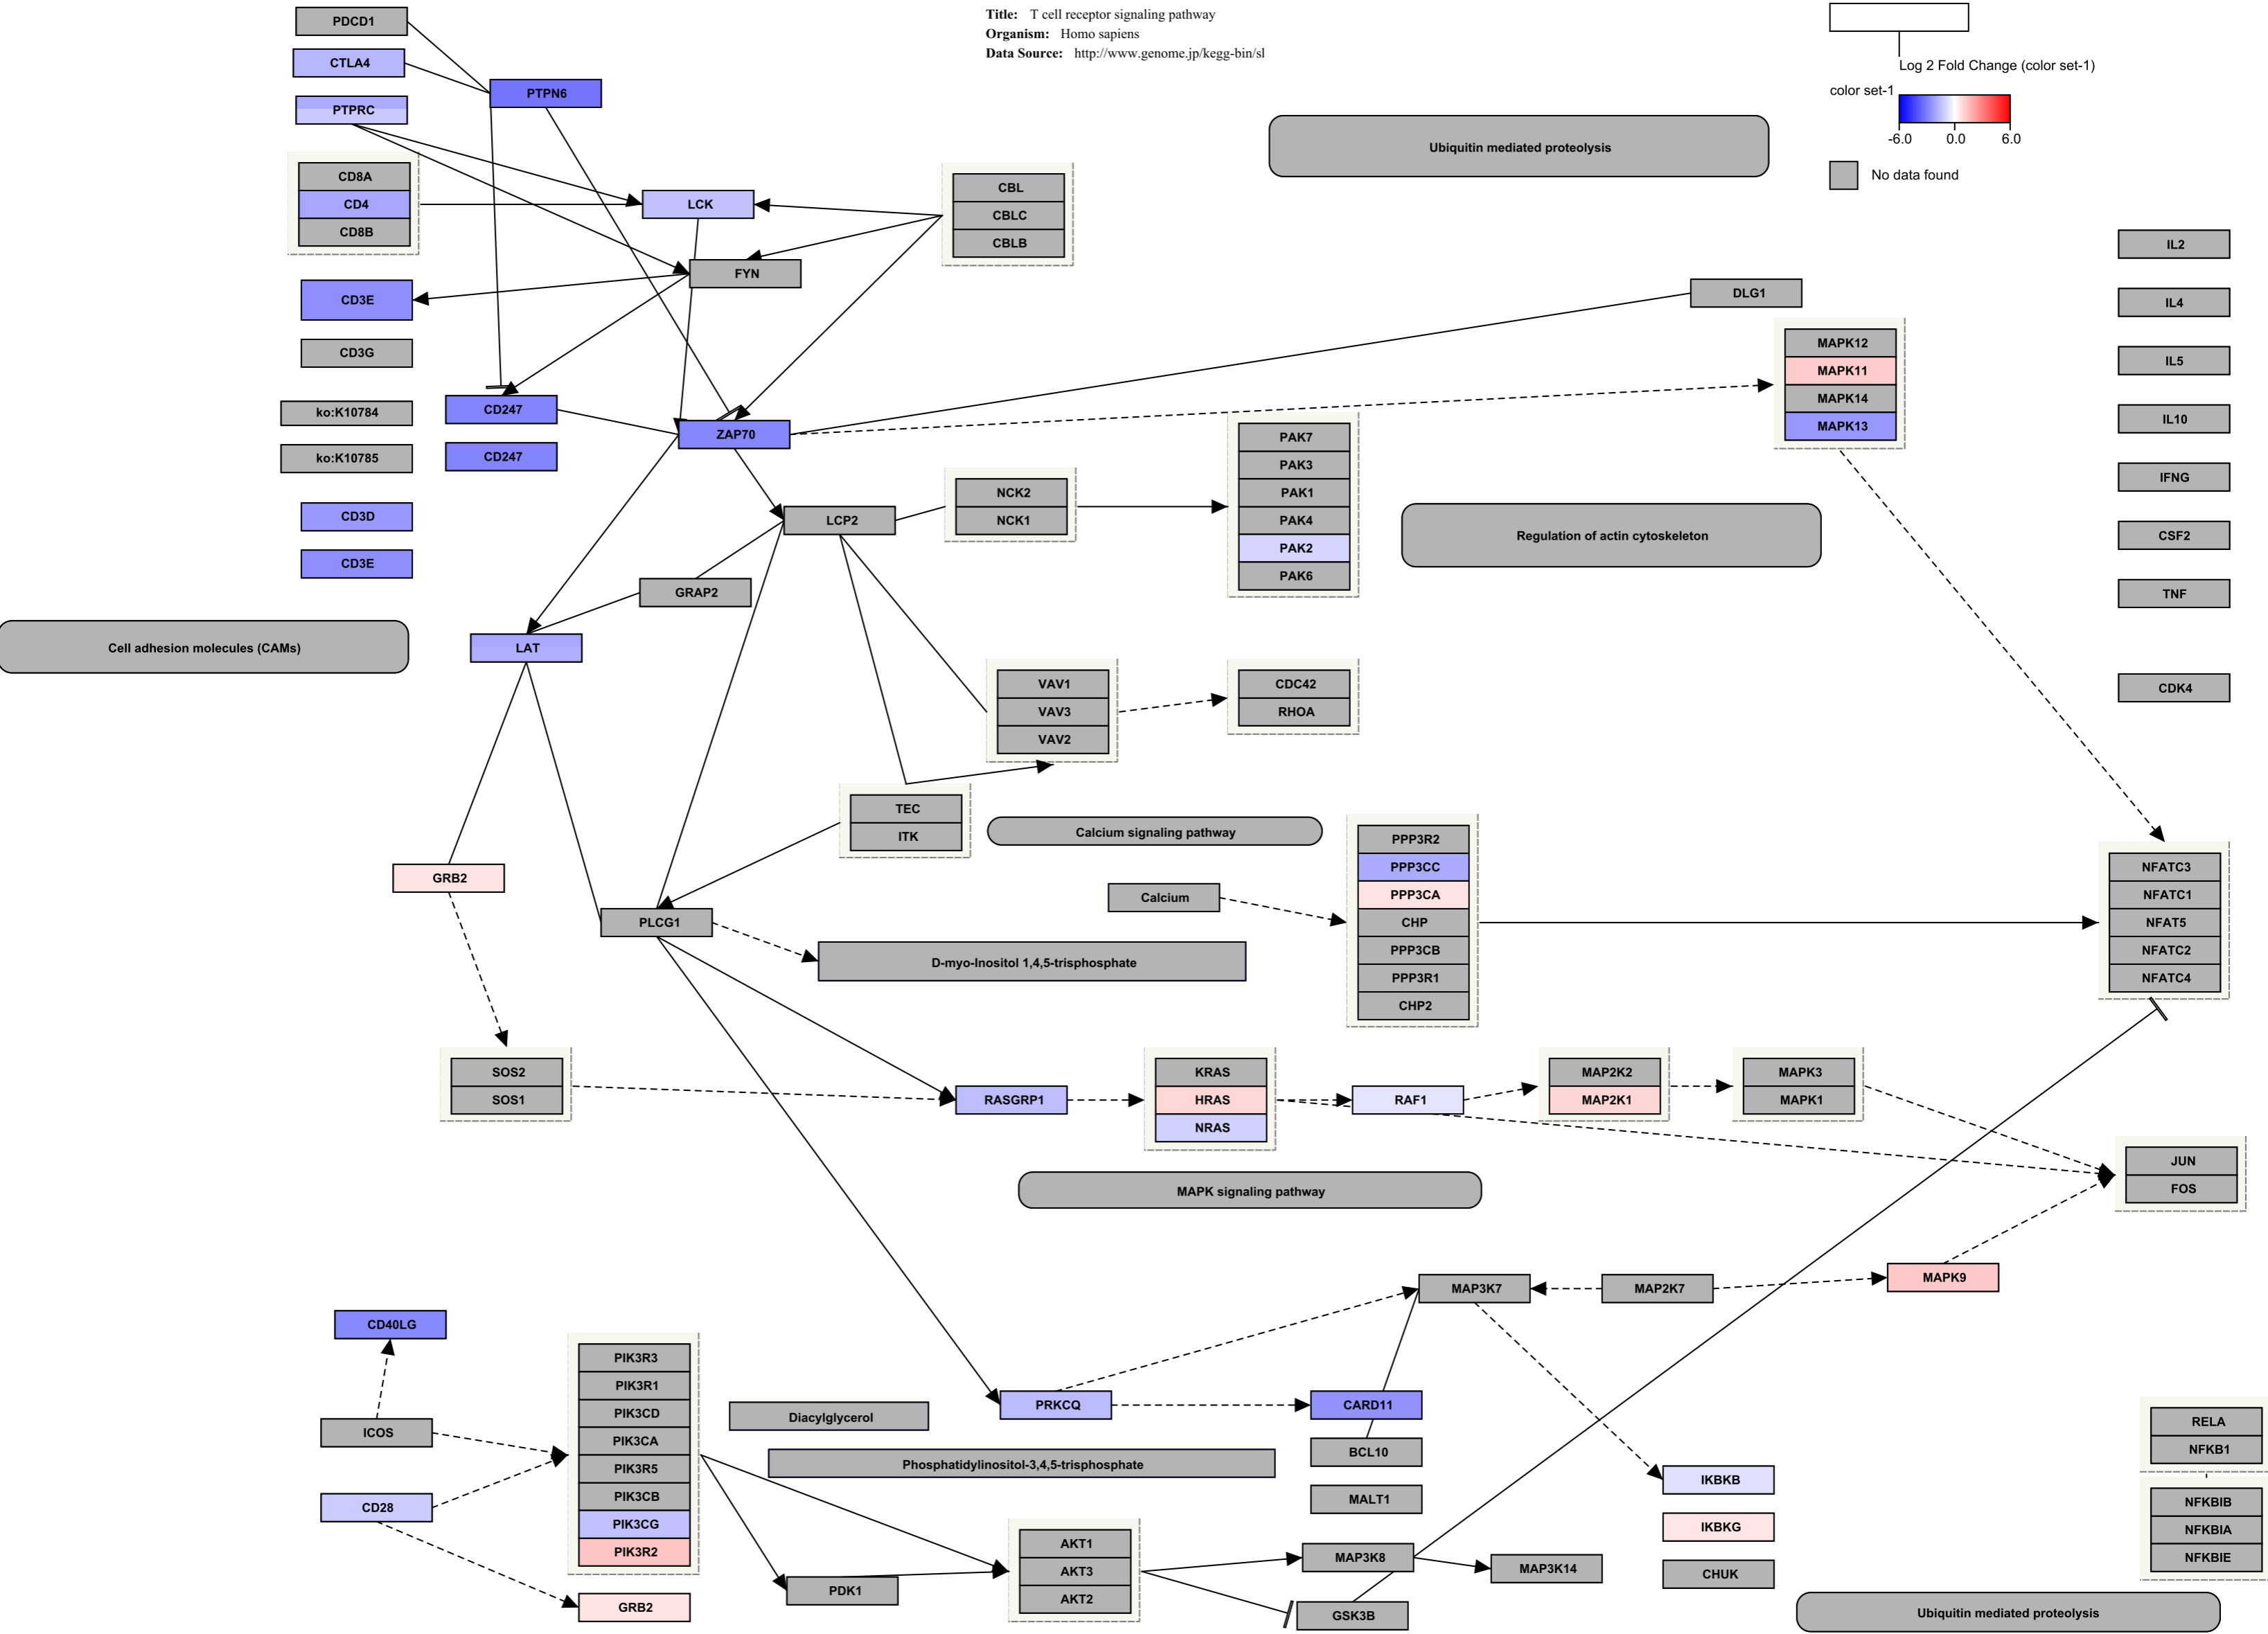

Supplement: NIHMS715499-supplement-Supplemental_Figure_4.pdf [file NIHMS715499-supplement-Supplemental_Figure_4.pdf]
